# Supplementary material for: Predictors of near-term fracture in osteoporotic women aged ≥65 years, based on data from the study of osteoporotic fractures
Source: Springer Nature journal article supplement (doi:10.1007/s00198-017-4103-3), 2017-06-07
Supplement: MOESM1 [file 12346398]

| Online Supplement — Table 1. Bivariate analyses of risk factors for 1-year hip fracture in osteoporotic women aged ≥ 65 years* |                           |                     |                      |                 |              |          |         |
|--------------------------------------------------------------------------------------------------------------------------------|---------------------------|---------------------|----------------------|-----------------|--------------|----------|---------|
| Category/Variable/Value                                                                                                        |                           | No. of Person-Exams | No. of Hip Fractures | % with Fracture | Hip Fracture |          |         |
|                                                                                                                                |                           |                     |                      |                 | HR           | 95% CI   | p-Value |
| <b>Anthropometry</b>                                                                                                           |                           |                     |                      |                 |              |          |         |
| Age                                                                                                                            | 65-74 (referent)          | 935                 | 9                    | 1.0%            | ---          | ---      | ---     |
|                                                                                                                                | ≥ 75 to 79                | 1904                | 26                   | 1.4%            | 1.4          | 0.7-3.0  | 0.357   |
|                                                                                                                                | ≥ 80 to 84                | 1978                | 47                   | 2.4%            | 2.5          | 1.2-5.2  | 0.011   |
|                                                                                                                                | ≥ 85                      | 1923                | 68                   | 3.5%            | 3.8          | 1.9-7.6  | <0.001  |
| Weight (kg)                                                                                                                    | ≤ 63                      | 5055                | 123                  | 2.4%            | 1.6          | 1.1-2.5  | 0.024   |
|                                                                                                                                | >63 (referent)            | 1712                | 26                   | 1.5%            | ---          | ---      | ---     |
| <b>Bone Density</b>                                                                                                            |                           |                     |                      |                 |              |          |         |
| Total Hip T-Score                                                                                                              | ≤ -3.5                    | 1277                | 52                   | 4.1%            | 3.0          | 2.1-4.5  | <0.001  |
|                                                                                                                                | > -3.5 to -3.0            | 1967                | 50                   | 2.5%            | 1.9          | 1.3-2.8  | 0.002   |
|                                                                                                                                | > -3.0 to -2.5 (referent) | 3567                | 49                   | 1.4%            | ---          | ---      | ---     |
| <b>Cognitive Function</b>                                                                                                      |                           |                     |                      |                 |              |          |         |
| Mini-Mental State Examination (MMSE)                                                                                           | ≤ 23                      | 2208                | 75                   | 3.4%            | 2.1          | 1.5-2.9  | <0.001  |
|                                                                                                                                | >23 (referent)            | 4593                | 76                   | 1.7%            | ---          | ---      | ---     |
| <b>Comorbid Conditions (vs. referent: without conditions)</b>                                                                  |                           |                     |                      |                 |              |          |         |
| Alzheimer's Disease                                                                                                            | Yes                       | 298                 | 15                   | 5.0%            | 2.9          | 1.7-4.9  | <0.001  |
|                                                                                                                                | No (referent)             | 6233                | 123                  | 2.0%            | ---          | ---      | ---     |
| Hypertension                                                                                                                   | Yes                       | 2770                | 63                   | 2.3%            | 1.1          | 0.8-1.5  | 0.560   |
|                                                                                                                                | No (referent)             | 3574                | 75                   | 2.1%            | ---          | ---      | ---     |
| Parkinson's Disease                                                                                                            | Yes                       | 114                 | 5                    | 4.4%            | 2.1          | 0.9-5.2  | 0.099   |
|                                                                                                                                | No (referent)             | 6697                | 146                  | 2.2%            | ---          | ---      | ---     |
| Stroke                                                                                                                         | Yes                       | 736                 | 24                   | 3.3%            | 1.6          | 1.0-2.5  | 0.036   |
|                                                                                                                                | No (referent)             | 6075                | 127                  | 2.1%            | ---          | ---      | ---     |
| Parkinson's or Stroke                                                                                                          | Yes                       | 837                 | 29                   | 3.5%            | 1.7          | 1.2-2.6  | 0.007   |
|                                                                                                                                | No (referent)             | 5974                | 122                  | 2.0%            | ---          | ---      | ---     |
| <b>Drug Use</b>                                                                                                                |                           |                     |                      |                 |              |          |         |
| Anticonvulsant                                                                                                                 | Yes                       | 185                 | 7                    | 3.8%            | 1.9          | 0.9-4.1  | 0.089   |
|                                                                                                                                | No (referent)             | 6057                | 121                  | 2.0%            | ---          | ---      | ---     |
| Bisphosphonate                                                                                                                 | Yes                       | 507                 | 5                    | 1.0%            | 0.5          | 0.2-1.1  | 0.086   |
|                                                                                                                                | No (referent)             | 5735                | 123                  | 2.1%            | ---          | ---      | ---     |
| CCB                                                                                                                            | Yes                       | 1092                | 24                   | 2.2%            | 1.1          | 0.7-1.7  | 0.720   |
|                                                                                                                                | No (referent)             | 5150                | 104                  | 2.0%            | ---          | ---      | ---     |
| Estrogen                                                                                                                       | Yes                       | 359                 | 12                   | 3.3%            | 0.9          | 0.5-1.6  | 0.641   |
|                                                                                                                                | No (referent)             | 5583                | 116                  | 2.1%            | ---          | ---      | ---     |
| Nitrate                                                                                                                        | Yes                       | 474                 | 15                   | 3.2%            | 1.7          | 1.0-2.8  | 0.067   |
|                                                                                                                                | No (referent)             | 5768                | 113                  | 2.0%            | ---          | ---      | ---     |
| NSAID                                                                                                                          | Yes                       | 1014                | 13                   | 1.3%            | 0.6          | 0.3-1.0  | 0.059   |
|                                                                                                                                | No (referent)             | 5228                | 115                  | 2.2%            | ---          | ---      | ---     |
| SSRI                                                                                                                           | Yes                       | 296                 | 7                    | 2.4%            | 1.2          | 0.6-2.6  | 0.241   |
|                                                                                                                                | No (referent)             | 5946                | 121                  | 2.0%            | ---          | ---      | ---     |
| <b>Fracture and Fall History</b>                                                                                               |                           |                     |                      |                 |              |          |         |
| No. of Falls in Last 12 Months                                                                                                 | 0 (referent)              | 4365                | 79                   | 1.8%            | ---          | ---      | ---     |
|                                                                                                                                | 1                         | 1343                | 32                   | 2.4%            | 1.3          | 0.9-2.0  | 0.178   |
|                                                                                                                                | ≥ 2                       | 1068                | 37                   | 3.5%            | 2.0          | 1.4-3.0  | <0.001  |
| Prior Fracture (after age 50 years)                                                                                            | Family History Hip Fx     | 1442                | 43                   | 3.0%            | 1.5          | 1.1-2.1  | 0.026   |
|                                                                                                                                | Non-Vertebral Fx          | 5168                | 103                  | 2.0%            | ---          | ---      | ---     |
|                                                                                                                                | Hip Fx                    | 4524                | 114                  | 2.5%            | 1.6          | 1.1-2.3  | 0.015   |
|                                                                                                                                | Vertebral Fx              | 2270                | 37                   | 1.6%            | ---          | ---      | ---     |
|                                                                                                                                | Any Fx                    | 905                 | 30                   | 3.3%            | 1.7          | 1.1-2.5  | 0.011   |
|                                                                                                                                |                           | 5894                | 121                  | 2.1%            | ---          | ---      | ---     |
|                                                                                                                                |                           | 1241                | 40                   | 3.2%            | 1.7          | 1.2-2.4  | 0.006   |
|                                                                                                                                |                           | 5570                | 111                  | 2.0%            | ---          | ---      | ---     |
|                                                                                                                                |                           | 4619                | 115                  | 2.5%            | 1.5          | 1.1-2.3  | 0.022   |
|                                                                                                                                |                           | 2192                | 36                   | 1.6%            | ---          | ---      | ---     |
| <b>Lifestyle</b>                                                                                                               |                           |                     |                      |                 |              |          |         |
| Physical Activity in Past Week                                                                                                 | None (referent)           | 2210                | 61                   | 2.8%            | ---          | ---      | ---     |
|                                                                                                                                | Any                       | 4596                | 90                   | 2.0%            | 0.7          | 0.5-1.0  | 0.032   |
| Physical Activity, No. Flights Up Stairs/Day                                                                                   | ≤ 3                       | 3711                | 100                  | 2.7%            | 1.7          | 1.2-2.3  | 0.003   |
|                                                                                                                                | >3 (referent)             | 3100                | 51                   | 1.6%            | ---          | ---      | ---     |
| Physical Activity, Hours on Feet/Day                                                                                           | ≤ 4                       | 1164                | 39                   | 3.4%            | 1.7          | 1.2-2.5  | 0.003   |
|                                                                                                                                | >4 (referent)             | 5646                | 112                  | 2.0%            | ---          | ---      | ---     |
| Number of Drinks/Week in Past 30 Days                                                                                          | 0                         | 4228                | 104                  | 2.5%            | 2.0          | 0.7-5.5  | 0.198   |
|                                                                                                                                | 1 to 6                    | 2190                | 43                   | 2.0%            | 2.5          | 0.9-6.8  | 0.072   |
|                                                                                                                                | ≥ 7 (referent)            | 393                 | 4                    | 1.0%            | ---          | ---      | ---     |
| Smoker, Pack Years (continuous measure)                                                                                        | ---                       | ---                 | ---                  | ---             | 1.0          | 1.0-1.0  | 0.159   |
| <b>Other Medical Conditions</b>                                                                                                |                           |                     |                      |                 |              |          |         |
| Weakness/Paralysis Left/Right Leg                                                                                              | Yes                       | 538                 | 20                   | 3.7%            | 1.9          | 1.2-3.0  | 0.010   |
|                                                                                                                                | No (referent)             | 6103                | 125                  | 2.0%            | ---          | ---      | ---     |
| Hip/Knee/Ankle Joint Pain                                                                                                      | Yes                       | 2823                | 73                   | 2.6%            | 1.4          | 1.0-1.9  | 0.050   |
|                                                                                                                                | No (referent)             | 3818                | 72                   | 1.9%            | ---          | ---      | ---     |
| Leg/Ankle Swelling                                                                                                             | Yes                       | 1419                | 42                   | 3.0%            | 1.5          | 1.1-2.2  | 0.022   |
|                                                                                                                                | No (referent)             | 5223                | 103                  | 2.0%            | ---          | ---      | ---     |
| Weak Arms/Hands                                                                                                                | Yes                       | 2031                | 55                   | 2.7%            | 1.4          | 1.0-2.0  | 0.047   |
|                                                                                                                                | No (referent)             | 4610                | 90                   | 2.0%            | ---          | ---      | ---     |
| <b>Physical Function</b>                                                                                                       |                           |                     |                      |                 |              |          |         |
| No. of IADL Impairments**                                                                                                      | 0 (referent)              | 3415                | 56                   | 1.6%            | ---          | ---      | ---     |
|                                                                                                                                | 1 to 3                    | 2376                | 55                   | 2.3%            | 1.4          | 1.0-2.1  | 0.056   |
|                                                                                                                                | ≥ 4                       | 1020                | 40                   | 3.9%            | 2.6          | 1.7-3.9  | <0.001  |
| Total Difficulty with 5 IADL***                                                                                                | ---                       | 6811                | 151                  | 2.2%            | 1.1          | 1.0-1.1  | <0.001  |
| Degree of Difficulty Walking 2-3 Blocks                                                                                        | None (referent)           | 4628                | 85                   | 1.8%            | ---          | ---      | ---     |
|                                                                                                                                | Some                      | 623                 | 18                   | 2.9%            | 1.6          | 1.0-2.7  | 0.067   |
|                                                                                                                                | Much                      | 407                 | 11                   | 2.7%            | 1.5          | 0.8-2.8  | 0.194   |
|                                                                                                                                | Unable                    | 1153                | 37                   | 3.2%            | 1.8          | 1.3-2.7  | 0.002   |
| <b>Physical Performance</b>                                                                                                    |                           |                     |                      |                 |              |          |         |
| Use of Arms to Stand Up                                                                                                        | Yes                       | 1286                | 47                   | 3.7%            | 2.0          | 1.4-2.8  | <0.001  |
|                                                                                                                                | No (referent)             | 5525                | 104                  | 1.9%            | ---          | ---      | ---     |
| Use of Arms to Stand Up 5 Times (always, partial, none)                                                                        | None (referent)           | 5941                | 116                  | 2.0%            | ---          | ---      | ---     |
|                                                                                                                                | Partial                   | 95                  | 6                    | 6.3%            | 3.4          | 1.5-7.7  | 0.004   |
|                                                                                                                                | Always                    | 770                 | 29                   | 3.8%            | 2.0          | 1.3-3.0  | <0.001  |
| Ability to Do Tandem Stand with Eyes Open                                                                                      | Very poor                 | 75                  | 4                    | 5.3%            | 4.4          | 1.6-12.4 | 0.005   |
|                                                                                                                                | Poor                      | 734                 | 36                   | 4.9%            | 4.1          | 2.6-6.4  | <0.001  |
|                                                                                                                                | Fair                      | 2774                | 70                   | 2.5%            | 2.0          | 1.4-3.0  | <0.001  |
|                                                                                                                                | Good (referent)           | 3225                | 41                   | 1.3%            | ---          | ---      | ---     |
| Use of Arms for Chair Stands or Poor/Very Poor Tandem Stand                                                                    | Yes                       | 1754                | 70                   | 4.0%            | 2.6          | 1.9-3.6  | <0.001  |
|                                                                                                                                | No (referent)             | 5057                | 81                   | 1.6%            | ---          | ---      | ---     |
| Average Right/Left Grip Strength (kg)                                                                                          | ---                       | ---                 | ---                  | ---             | 1.0          | 0.9-1.0  | 0.006   |
| Maximum Right/Left Grip Strength (kg)                                                                                          | ---                       | ---                 | ---                  | ---             | 1.0          | 0.9-1.0  | 0.005   |
| Walking Speed (m/s)                                                                                                            | >1.0 (referent)           | 1975                | 17                   | 0.9%            | ---          | ---      | ---     |
|                                                                                                                                | ≤ 0.70                    | 1635                | 59                   | 3.6%            | 4.4          | 2.6-7.6  | <0.001  |
|                                                                                                                                | 0.70 to 1.0               | 3201                | 75                   | 2.3%            | 2.8          | 1.6-4.7  | <0.001  |
| <b>Visual Function</b>                                                                                                         |                           |                     |                      |                 |              |          |         |
| Lens Implant                                                                                                                   | Yes                       | 1848                | 50                   | 2.7%            | 1.3          | 1.0-1.9  | 0.091   |
|                                                                                                                                | No (referent)             | 4963                | 101                  | 2.0%            | ---          | ---      | ---     |
| Average Contrast Sensitivity Score                                                                                             | ≤ 40                      | 2499                | 78                   | 3.1%            | 1.9          | 1.4-2.6  | <0.001  |
|                                                                                                                                | >40 (referent)            | 4247                | 71                   | 1.7%            | ---          | ---      | ---     |

\*Only results for risk factors with p-value <0.1 for ≥1 level are reported

\*\*No. of IADL impairments (out of 5), with any difficulty, including walking 2-3 blocks, climbing up 10 steps, preparing meal, heavy housework, shopping

\*\*\*Total difficulty with IADL impairments (0=no difficulty, 3=maximum difficulty)

| Online Supplement — Table 2. Bivariate analyses of risk factors for 1-year non-vertebral fracture in osteoporotic women aged ≥ 65 years* |                                |                     |                                |                 |                        |           |           |        |
|------------------------------------------------------------------------------------------------------------------------------------------|--------------------------------|---------------------|--------------------------------|-----------------|------------------------|-----------|-----------|--------|
| Category/Variable/Value                                                                                                                  |                                | No. of Person-Exams | No. of Non-Vertebral Fractures | % with Fracture | Non-Vertebral Fracture |           |           |        |
|                                                                                                                                          |                                |                     |                                |                 | HR                     | 95% CI    | p-Value   |        |
| <b>Anthropometry</b>                                                                                                                     |                                |                     |                                |                 |                        |           |           |        |
| Age                                                                                                                                      | 65-74 (referent)               | 935                 | 46                             | 4.9             | ---                    | ---       | ---       |        |
|                                                                                                                                          | ≥ 75 to 79                     | 1,904               | 101                            | 5.3             | 1.1                    | 0.8 - 1.5 | 0.648     |        |
|                                                                                                                                          | ≥ 80 to 84                     | 1,978               | 125                            | 6.3             | 1.3                    | 0.9 - 1.8 | 0.114     |        |
|                                                                                                                                          | ≥ 85                           | 1,985               | 179                            | 9.0             | 2.0                    | 1.4 - 2.7 | <0.001    |        |
| Weight (kg)                                                                                                                              | ≤ 63                           | 5,055               | 337                            | 6.7             | 1.1                    | 0.9 - 1.3 | 0.595     |        |
|                                                                                                                                          | >63 (referent)                 | 1,712               | 109                            | 6.4             | ---                    | ---       | ---       |        |
| <b>Bone Density</b>                                                                                                                      |                                |                     |                                |                 |                        |           |           |        |
| Total Hip T-Score                                                                                                                        | ≤ -3.5                         | 1,277               | 131                            | 10.3            | 2.2                    | 1.7 - 2.8 | <0.001    |        |
|                                                                                                                                          | > -3.5 to -3.0                 | 1,967               | 147                            | 7.5             | 1.6                    | 1.3 - 1.9 | <0.001    |        |
|                                                                                                                                          | > -3.0 to -2.5 (referent)      | 3,567               | 174                            | 4.9             | ---                    | ---       | ---       |        |
| <b>Cognitive Function</b>                                                                                                                |                                |                     |                                |                 |                        |           |           |        |
| Mini-Mental State Examination (MMSE)                                                                                                     | ≤ 23                           | 2,208               | 166                            | 7.5             | 1.2                    | 1.0 - 1.5 | 0.033     |        |
|                                                                                                                                          | >23 (referent)                 | 4,593               | 285                            | 6.2             | ---                    | ---       | ---       |        |
| <b>Comorbid Conditions (vs. referent: without conditions)</b>                                                                            |                                |                     |                                |                 |                        |           |           |        |
| Alzheimer's Disease                                                                                                                      | Yes                            | 298                 | 24                             | 8.1             | 1.4                    | 0.9 - 2.1 | 0.110     |        |
|                                                                                                                                          | No (referent)                  | 6,233               | 400                            | 6.4             | ---                    | ---       | ---       |        |
| Hypertension                                                                                                                             | Yes                            | 2,770               | 200                            | 7.2             | 1.2                    | 1.0 - 1.5 | 0.053     |        |
|                                                                                                                                          | No (referent)                  | 3,574               | 219                            | 6.1             | ---                    | ---       | ---       |        |
| Parkinson's Disease                                                                                                                      | Yes                            | 114                 | 15                             | 13.2            | 2.2                    | 1.3 - 3.7 | 0.003     |        |
|                                                                                                                                          | No (referent)                  | 6,697               | 437                            | 6.5             | ---                    | ---       | ---       |        |
| Stroke                                                                                                                                   | Yes                            | 736                 | 67                             | 9.1             | 1.5                    | 1.1 - 1.9 | 0.003     |        |
|                                                                                                                                          | No (referent)                  | 6,075               | 385                            | 6.3             | ---                    | ---       | ---       |        |
| Parkinson's or Stroke                                                                                                                    | Yes                            | 837                 | 79                             | 9.4             | 1.6                    | 1.2 - 2.0 | <0.001    |        |
|                                                                                                                                          | No (referent)                  | 5,974               | 373                            | 6.2             | ---                    | ---       | ---       |        |
| <b>Drug Use</b>                                                                                                                          |                                |                     |                                |                 |                        |           |           |        |
| Anticonvulsant                                                                                                                           | Yes                            | 185                 | 15                             | 8.1             | 1.3                    | 0.8 - 2.2 | 0.330     |        |
|                                                                                                                                          | No (referent)                  | 6,057               | 390                            | 6.4             | ---                    | ---       | ---       |        |
| Bisphosphonate                                                                                                                           | Yes                            | 507                 | 36                             | 7.1             | 1.1                    | 0.8 - 1.6 | 0.553     |        |
|                                                                                                                                          | No (referent)                  | 5,735               | 369                            | 6.4             | ---                    | ---       | ---       |        |
| CCB                                                                                                                                      | Yes                            | 1,092               | 85                             | 7.8             | 1.3                    | 1.0 - 1.6 | 0.054     |        |
|                                                                                                                                          | No (referent)                  | 5,150               | 320                            | 6.2             | ---                    | ---       | ---       |        |
| Estrogen                                                                                                                                 | Yes                            | 659                 | 33                             | 5.0             | 0.7                    | 0.5 - 1.1 | 0.096     |        |
|                                                                                                                                          | No (referent)                  | 5,583               | 372                            | 6.7             | ---                    | ---       | ---       |        |
| Nitrate                                                                                                                                  | Yes                            | 474                 | 34                             | 7.2             | 1.1                    | 0.8 - 1.6 | 0.469     |        |
|                                                                                                                                          | No (referent)                  | 5,768               | 371                            | 6.4             | ---                    | ---       | ---       |        |
| NSAID                                                                                                                                    | Yes                            | 1,014               | 61                             | 6.0             | 0.9                    | 0.7 - 1.2 | 0.481     |        |
|                                                                                                                                          | No (referent)                  | 5,228               | 344                            | 6.6             | ---                    | ---       | ---       |        |
| SSRI                                                                                                                                     | Yes                            | 296                 | 26                             | 8.8             | 1.5                    | 1.0 - 2.2 | 0.065     |        |
|                                                                                                                                          | No (referent)                  | 5,946               | 379                            | 6.4             | ---                    | ---       | ---       |        |
| <b>Fracture and Fall History</b>                                                                                                         |                                |                     |                                |                 |                        |           |           |        |
| No. of Falls in Last 12 Months                                                                                                           | 0 (referent)                   | 4,365               | 247                            | 5.7             | ---                    | ---       | ---       |        |
|                                                                                                                                          | 1                              | 1,343               | 96                             | 7.1             | 1.3                    | 1.0 - 1.6 | 0.040     |        |
|                                                                                                                                          | ≥ 2                            | 1,068               | 104                            | 9.7             | 1.8                    | 1.5 - 2.3 | <0.001    |        |
| Prior Fracture (after age 50 years)                                                                                                      | Family History Hip Fx After 50 | Yes                 | 1,442                          | 113             | 7.8                    | 1.3       | 1.0 - 1.6 | 0.039  |
|                                                                                                                                          |                                | No (referent)       | 5,168                          | 326             | 6.3                    | ---       | ---       | ---    |
|                                                                                                                                          | Non-Vertebral Fracture         | Yes                 | 4,524                          | 336             | 7.4                    | 1.5       | 1.2 - 1.9 | <0.001 |
|                                                                                                                                          |                                | No (referent)       | 2,270                          | 116             | 5.1                    | ---       | ---       | ---    |
|                                                                                                                                          |                                | Hip                 | 905                            | 80              | 8.8                    | 1.5       | 1.2 - 1.9 | 0.002  |
|                                                                                                                                          | Vertebral                      | Yes                 | 5,894                          | 372             | 6.3                    | ---       | ---       | ---    |
|                                                                                                                                          |                                | No (referent)       | 1,241                          | 108             | 8.7                    | 1.5       | 1.2 - 1.8 | <0.001 |
| Any Site                                                                                                                                 | Yes                            | 5,570               | 344                            | 6.2             | ---                    | ---       | ---       |        |
|                                                                                                                                          | No (referent)                  | 4,616               | 344                            | 7.5             | 1.6                    | 1.3 - 1.9 | <0.001    |        |
| ---                                                                                                                                      | ---                            | 2,195               | 108                            | 4.9             | ---                    | ---       | ---       |        |
| <b>Lifestyle</b>                                                                                                                         |                                |                     |                                |                 |                        |           |           |        |
| Physical Activity in Past Week                                                                                                           | None                           | 2,210               | 158                            | 7.1             | 1.1                    | 0.9 - 1.4 | 0.212     |        |
|                                                                                                                                          | Any (referent)                 | 4,596               | 294                            | 6.4             | ---                    | ---       | ---       |        |
| Physical Activity, No. Flights Up Stairs/Day                                                                                             | ≤ 3                            | 3,711               | 264                            | 7.1             | 1.2                    | 1.0 - 1.4 | 0.059     |        |
|                                                                                                                                          | >3 (referent)                  | 3,100               | 188                            | 6.1             | ---                    | ---       | ---       |        |
| Physical Activity, Hours on Feet/Day                                                                                                     | ≤ 4                            | 1,164               | 98                             | 8.4             | 1.4                    | 1.1 - 1.7 | 0.003     |        |
|                                                                                                                                          | >4 (referent)                  | 5,646               | 354                            | 6.3             | ---                    | ---       | ---       |        |
| Number of Drinks/Week in Past 30 Days                                                                                                    | 0                              | 4,228               | 286                            | 6.8             | 1.2                    | 0.8 - 1.8 | 0.399     |        |
|                                                                                                                                          | 1 to 6                         | 2,190               | 143                            | 6.5             | 1.1                    | 0.7 - 1.8 | 0.569     |        |
|                                                                                                                                          | ≥ 7 (referent)                 | 393                 | 23                             | 5.9             | ---                    | ---       | ---       |        |
| Smoker, Pack Years (continuous measure)                                                                                                  | ≥ 7 (referent)                 | ---                 | ---                            | ---             | 1.0                    | 1.0 - 1.0 | 0.027     |        |
| <b>Other Medical Conditions</b>                                                                                                          |                                |                     |                                |                 |                        |           |           |        |
| Weakness/Paralysis Left/Right Leg                                                                                                        | Yes                            | 538                 | 41                             | 7.6             | 1.2                    | 0.9 - 1.7 | 0.264     |        |
|                                                                                                                                          | No (referent)                  | 6,103               | 397                            | 6.5             | ---                    | ---       | ---       |        |
| Hip/Knee/Ankle Joint Pain                                                                                                                | Yes                            | 2,823               | 199                            | 7.0             | 1.1                    | 0.9 - 1.4 | 0.176     |        |
|                                                                                                                                          | No (referent)                  | 3,818               | 239                            | 6.3             | ---                    | ---       | ---       |        |
| Leg/Ankle Swelling                                                                                                                       | Yes                            | 1,419               | 111                            | 7.8             | 1.3                    | 1.0 - 1.6 | 0.033     |        |
|                                                                                                                                          | No (referent)                  | 5,223               | 327                            | 6.3             | ---                    | ---       | ---       |        |
| Weak Arms/Hands                                                                                                                          | Yes                            | 2,031               | 128                            | 6.3             | 0.9                    | 0.8 - 1.2 | 0.569     |        |
|                                                                                                                                          | No (referent)                  | 4,610               | 310                            | 6.7             | ---                    | ---       | ---       |        |
| <b>Physical Function</b>                                                                                                                 |                                |                     |                                |                 |                        |           |           |        |
| No. of IADL Impairments**                                                                                                                | 0 (referent)                   | 3,415               | 191                            | 5.6             | ---                    | ---       | ---       |        |
|                                                                                                                                          | 1 to 3                         | 2,376               | 162                            | 6.8             | 1.2                    | 1.0 - 1.5 | 0.042     |        |
|                                                                                                                                          | ≥ 4                            | 1,020               | 99                             | 9.7             | 1.9                    | 1.5 - 2.4 | <0.001    |        |
| Total Difficulty with 5 IADL***                                                                                                          | 0                              | 6,811               | 0                              | 0.0             | 1.1                    | 1.0 - 1.1 | <0.001    |        |
|                                                                                                                                          | None (referent)                | 4,628               | 277                            | 6.0             | ---                    | ---       | ---       |        |
|                                                                                                                                          | Some                           | 623                 | 45                             | 7.2             | 1.2                    | 0.9 - 1.7 | 0.186     |        |
|                                                                                                                                          | Much                           | 407                 | 33                             | 8.1             | 1.4                    | 1.0 - 2.0 | 0.062     |        |
| Unable                                                                                                                                   | 1,153                          | 97                  | 8.4                            | 1.5             | 1.2 - 1.9              | <0.001    |           |        |
| <b>Physical Performance</b>                                                                                                              |                                |                     |                                |                 |                        |           |           |        |
| Use of Arms to Stand Up                                                                                                                  | Yes                            | 1,286               | 116                            | 9.0             | 1.5                    | 1.2 - 1.9 | <0.001    |        |
|                                                                                                                                          | No (referent)                  | 5,525               | 336                            | 6.1             | ---                    | ---       | ---       |        |
| Use of Arms to Stand Up 5 Times (always, partial, none)                                                                                  | None (referent)                | 5,941               | 370                            | 6.2             | ---                    | ---       | ---       |        |
|                                                                                                                                          | Partial                        | 95                  | 9                              | 9.5             | 1.6                    | 0.8 - 3.1 | 0.177     |        |
|                                                                                                                                          | Always                         | 770                 | 73                             | 9.5             | 1.6                    | 1.2 - 2.0 | <0.001    |        |
| Ability to Do Tandem Stand with Eyes Open                                                                                                | Very poor                      | 75                  | 5                              | 6.7             | 1.3                    | 0.5 - 3.1 | 0.597     |        |
|                                                                                                                                          | Poor                           | 734                 | 72                             | 9.8             | 1.9                    | 1.4 - 2.5 | <0.001    |        |
|                                                                                                                                          | Fair                           | 2,774               | 198                            | 7.1             | 1.3                    | 1.1 - 1.6 | 0.006     |        |
| Use of Arms for Chair Stands or Poor/Very Poor Tandem Stand                                                                              | Good (referent)                | 3,225               | 177                            | 5.5             | ---                    | ---       | ---       |        |
|                                                                                                                                          | Yes                            | 1,754               | 159                            | 9.1             | 1.6                    | 1.3 - 2.0 | <0.001    |        |
| No (referent)                                                                                                                            | 5,057                          | 293                 | 5.8                            | ---             | ---                    | ---       |           |        |
| Average Right/Left Grip Strength (kg)                                                                                                    | ---                            | ---                 | ---                            | ---             | 1.0                    | 1.0 - 1.0 | 0.003     |        |
| Maximum Right/Left Grip Strength (kg)                                                                                                    | ---                            | ---                 | ---                            | ---             | 1.0                    | 1.0 - 1.0 | 0.007     |        |
| Walking Speed (m/s)                                                                                                                      | >1.0 (referent)                | 1,635               | 145                            | 8.9             | 2.2                    | 1.7 - 2.9 | <0.001    |        |
|                                                                                                                                          | ≤ 0.70                         | 3,201               | 222                            | 6.9             | 1.6                    | 1.3 - 2.1 | <0.001    |        |
|                                                                                                                                          | 0.70 to 1.0                    | 1,975               | 85                             | 4.3             | ---                    | ---       | ---       |        |
| <b>Visual Function</b>                                                                                                                   |                                |                     |                                |                 |                        |           |           |        |
| Lens Implant                                                                                                                             | Yes                            | 1,848               | 143                            | 7.7             | 1.3                    | 1.0 - 1.5 | 0.023     |        |
|                                                                                                                                          | No (referent)                  | 4,963               | 309                            | 6.2             | ---                    | ---       | ---       |        |
| Average Contrast Sensitivity Score                                                                                                       | ≤ 40                           | 2,499               | 197                            | 7.9             | 1.4                    | 1.1 - 1.7 | <0.001    |        |
|                                                                                                                                          | >40 (referent)                 | 4,247               | 249                            | 5.9             | ---                    | ---       | ---       |        |

\*Only results for risk factors with p-value <0.1 for ≥ 1 level are reported

\*\*No. of IADL impairments (out of 5), with any difficulty, including walking 2-3 blocks, climbing up 10 steps, preparing meal, heavy housework, shopping

\*\*\*Total difficulty with IADL impairments (0=no difficulty, 3=maximum difficulty)

**1-Year Osteoporotic Hip Fracture Risk Prediction Model**

Change "Value" to calculate fracture risk for individual patient (value =1 means patient has that characteristic)

| Characteristic                                                                             | Value | Model Coeff. | mean value            | beta*mean value | beta*(X-mean value) |
|--------------------------------------------------------------------------------------------|-------|--------------|-----------------------|-----------------|---------------------|
| Short MMSE ≤23 (vs. referent: >23)                                                         | 1.0   | 0.52669      | 0.0000                | 0               | 0.526693927         |
| Total Hip T-Score (vs. referent: > -3.0 to -2.5)                                           | 1.0   | 0.82185      | 0.0000                | 0               | 0.821853829         |
| ≤ -3.5                                                                                     | 0.0   | 0.46790      | 0.0000                | 0               | 0                   |
| > -3.5 to -3.0                                                                             | 1.0   | 0.46217      | 0.0000                | 0               | 0.462165214         |
| Prior Non-Vertebral Fracture (vs. referent: none)                                          | 1.0   | 0.46217      | 0.0000                | 0               | 0.462165214         |
| Walking Speed (m/s) (vs. referent: >1.0)                                                   | 1.0   | 1.07273      | 0.0000                | 0               | 1.072726839         |
| ≤ 0.70                                                                                     | 0.0   | 0.95427      | 0.0000                | 0               | 0                   |
| 0.70 to 1.0                                                                                | 1.0   | 0.54676      | 0.0000                | 0               | 0.546757575         |
| Use of Arms for Chair Stands or Poor/Very Poor Tandem Stand (vs. referent: no use of arms) | 1.0   | 0.54676      | 0.0000                | 0               | 0.546757575         |
|                                                                                            |       |              | sum of neg. beta*mean | 3.430197384     |                     |
|                                                                                            |       |              | Score                 | 30.88273789     |                     |
|                                                                                            |       |              | Prob. Fracture        | 0.088317319     |                     |

**1-Year Osteoporotic Hip Fracture Risk Scoring Sheet**

Sum individual characteristic scores for given patient → and then find corresponding probability of fracture

| IF                                                                                         | then score=  | If score= | The probability of fracture= |
|--------------------------------------------------------------------------------------------|--------------|-----------|------------------------------|
| Short MMSE ≤23 (vs. referent: >23)                                                         | 0.52669 5.3  | 5         | 0.3%                         |
| Total Hip T-Score (vs. referent: > -3.0 to -2.5)                                           |              |           | 0.3%                         |
| ≤ -3.5                                                                                     | 0.82185 8.2  | 8         | 0.4%                         |
| > -3.5 to -3.0                                                                             | 0.46790 4.7  | 5         | 0.4%                         |
| History of Non-Vertebral Fracture (vs. referent: no history of fracture)                   | 0.46217 4.6  | 5         | 0.4%                         |
| Walking Speed (m/s) (vs. referent: >1.0)                                                   |              |           | 0.5%                         |
| ≤ 0.70                                                                                     | 1.07273 10.7 | 11        | 0.5%                         |
| 0.70 to 1.0                                                                                | 0.95427 9.5  | 10        | 0.6%                         |
| Use of Arms for Chair Stands or Poor/Very Poor Tandem Stand (vs. referent: no use of arms) | 0.54676 5.5  | 5         | 0.7%                         |
|                                                                                            |              |           | 0.7%                         |
|                                                                                            |              |           | 0.8%                         |
|                                                                                            |              |           | 0.9%                         |
|                                                                                            |              |           | 1.0%                         |
|                                                                                            |              |           | 1.1%                         |
|                                                                                            |              |           | 1.2%                         |
|                                                                                            |              |           | 1.3%                         |
|                                                                                            |              |           | 1.5%                         |
|                                                                                            |              |           | 1.6%                         |
|                                                                                            |              |           | 1.8%                         |
|                                                                                            |              |           | 2.0%                         |
|                                                                                            |              |           | 2.2%                         |
|                                                                                            |              |           | 2.4%                         |
|                                                                                            |              |           | 2.7%                         |
|                                                                                            |              |           | 2.9%                         |
|                                                                                            |              |           | 3.2%                         |
|                                                                                            |              |           | 3.6%                         |
|                                                                                            |              |           | 4.0%                         |
|                                                                                            |              |           | 4.4%                         |
|                                                                                            |              |           | 4.8%                         |
|                                                                                            |              |           | 5.3%                         |
|                                                                                            |              |           | 5.8%                         |
|                                                                                            |              |           | 6.4%                         |
|                                                                                            |              |           | 7.1%                         |
|                                                                                            |              |           | 7.8%                         |
|                                                                                            |              |           | 8.6%                         |

Example: MMSE ≤23, T-score >-3.5 to -3.0, Hx of NVT Fx, Walking Speed >1.0, and No Use of Arms

Total Score = 5 + 5 + 5 + 0 + 0 = 15  
 1-Year Probability of Hip Fracture = 1.3%
